# Supplementary material for: Metal–organic architectures designed from a triphenyl-pentacarboxylate linker: hydrothermal assembly, structural multiplicity, and catalytic Knoevenagel condensation
Source: Royal Society of Chemistry journal article supplement (doi:10.1039/d1qi00680k), 2021-01-01
Supplement: d1qi00680k1.pdf [file d1qi00680k1.pdf]

## Electronic Supplementary Information (ESI)

# Metal-organic architectures designed from triphenyl-pentacarboxylate linker: hydrothermal assembly, structural multiplicity, and catalytic Knoevenagel condensation

Hong-Rui Zhang,<sup>a</sup> Jin-Zhong Gu,<sup>\*b</sup> Marina V. Kirillova<sup>c</sup> and Alexander M. Kirillov<sup>\*c,d</sup>

<sup>a</sup>School of Pharmacy, Lanzhou University, Lanzhou 730000, People's Republic of China. E-mail: zhanghr@lzu.edu.cn

<sup>b</sup>State Key Laboratory of Applied Organic Chemistry, Key Laboratory of Nonferrous Metal Chemistry and Resources Utilization of Gansu Province, College of Chemistry and Chemical Engineering, Lanzhou University, Lanzhou 730000, People's Republic of China. E-mail: gujzh@lzu.edu.cn

<sup>c</sup>Centro de Química Estrutural, Instituto Superior Técnico, Universidade de Lisboa, Av. Rovisco Pais, 1049-001, Lisbon, Portugal. E-mail: kirillov@tecnico.ulisboa.pt

<sup>d</sup>Peoples' Friendship University of Russia (RUDN University), 6 Miklukho-Maklaya st., Moscow, 117198, Russian Federation

### **Electronic Supplementary Information (ESI) contains:**

|                                              |              |
|----------------------------------------------|--------------|
| <i>Synthesis and analytical data for 1–8</i> | <i>p. 2</i>  |
| <i>FTIR spectra (Fig. S1)</i>                | <i>p. 4</i>  |
| <i>PXRD patterns (Fig. S2)</i>               | <i>p. 6</i>  |
| <i>Emission spectra (Fig. S3)</i>            | <i>p. 7</i>  |
| <i>Catalysis figures (Figs. S4–S7)</i>       | <i>p. 7</i>  |
| <i>Bonding parameters (Tables S1 and S2)</i> | <i>p. 8</i>  |
| <i>Catalysis data (Tables S3–S5)</i>         | <i>p. 12</i> |

## Synthesis and analytical data for 1–8

**Synthesis of  $[\text{Cu}_2(\mu\text{-H}_3\text{ddba})_2(\text{phen})_2]$  (1).** A mixture of  $\text{CuCl}_2 \cdot 2\text{H}_2\text{O}$  (17.1 mg, 0.10 mmol),  $\text{H}_5\text{ddba}$  (45.0 mg, 0.10 mmol),  $\text{NaOH}$  (8 mg, 0.20 mmol),  $\text{phen}$  (20.0 mg, 0.1 mmol), and  $\text{H}_2\text{O}$  (10 mL) was stirred at room temperature for 15 min, then sealed in a 25 mL Teflon-lined stainless steel vessel, and heated at 160 °C for 3 days, followed by cooling to room temperature at a rate of 10 °C·h<sup>-1</sup>. Blue block-shaped crystals of **1** were isolated manually, washed with distilled water and dried (yield: 65% based on  $\text{H}_5\text{ddba}$ ). Anal. Calcd for  $\text{C}_{70}\text{H}_{40}\text{Cu}_2\text{N}_4\text{O}_{20}$ : C, 60.74; H, 2.91; N, 4.05. Found: C, 60.41; H, 2.90; N, 4.07%. IR (KBr, cm<sup>-1</sup>): 1721 m, 1686 s, 1638 s, 1568 m, 1520 w, 1493 w, 1428 s, 1371 w, 1344 m, 1256 m, 1212 w, 1156 w, 1125 w, 1098 w, 914 w, 875 w, 844 w, 804 w, 765 w, 712 w, 681 w, 642 w.

**Synthesis of  $\{[\text{Cd}_2(\mu_4\text{-Hddba})(\text{phen})_2(\text{H}_2\text{O})_2] \cdot 2\text{H}_2\text{O}\}_n$  (2).** A mixture of  $\text{CdCl}_2 \cdot \text{H}_2\text{O}$  (40.2 mg, 0.20 mmol),  $\text{H}_5\text{ddba}$  (45.0 mg, 0.10 mmol),  $\text{phen}$  (40.0 mg, 0.20 mmol),  $\text{NaOH}$  (16 mg, 0.40 mmol), and  $\text{H}_2\text{O}$  (10 mL) was stirred at room temperature for 15 min, then sealed in a 25 mL Teflon-lined stainless steel vessel, and heated at 160 °C for 3 days, followed by cooling to room temperature at a rate of 10 °C·h<sup>-1</sup>. Colourless block-shaped crystals of **2** were isolated manually, washed with distilled water and dried (yield: 56% based on  $\text{H}_5\text{ddba}$ ). Anal. Calcd for  $\text{C}_{47}\text{H}_{34}\text{Cd}_2\text{N}_4\text{O}_{14}$ : C, 51.15; H, 3.11; N, 5.08. Found: C, 51.34; H, 3.13; N, 5.06%. IR (KBr, cm<sup>-1</sup>): 3460 w, 3066 w, 1704 w, 1598 s, 1546 s, 1511 w, 1428 m, 1371 s, 1287 w, 1209 w, 1142 w, 1103 w, 1046 w, 927 w, 853 m, 814 w, 778 w, 725 m, 703 w, 686 w, 637 w.

**Synthesis of  $[\text{Ni}_4(\mu_3\text{-Hddba})_2(2,2'\text{-bipy})_6(\text{H}_2\text{O})] \cdot 6\text{H}_2\text{O}$  (3).** A mixture of  $\text{NiCl}_2 \cdot 6\text{H}_2\text{O}$  (47.5 mg, 0.20 mmol),  $\text{H}_5\text{ddba}$  (45.0 mg, 0.10 mmol), 2,2'-bipy (31.2 mg, 0.20 mmol),  $\text{NaOH}$  (16 mg, 0.40 mmol), and  $\text{H}_2\text{O}$  (10 mL) was stirred at room temperature for 15 min, then sealed in a 25 mL Teflon-lined stainless steel vessel, and heated at 160 °C for 3 days, followed by cooling to room temperature at a rate of 10 °C·h<sup>-1</sup>. Green block-shaped crystals of **3** were isolated manually, washed with distilled water and dried (yield: 42% based on  $\text{H}_5\text{ddba}$ ). Anal. Calcd for  $\text{C}_{106}\text{H}_{84}\text{Ni}_4\text{N}_{12}\text{O}_{27}$ : C, 58.06; H, 3.86; N,

7.67. Found: C, 58.03; H, 3.88; N, 7.64%. IR (KBr,  $\text{cm}^{-1}$ ): 3421 m, 3066 w, 1701 w, 1625 s, 1603 s, 1577 s, 1528 m, 1489 w, 1476 w, 1445 s, 1410 s, 1371 m, 1314 w, 1252 w, 1160 w, 1103 w, 1054 w, 1024 w, 931 w, 905 w, 848 w, 818 w, 760 m, 733 w, 703 w, 654 w.

**Synthesis of  $[\text{Mn}_4(\mu_3\text{-Hddba})_2(2,2'\text{-bipy})_6(\text{H}_2\text{O})] \cdot 6\text{H}_2\text{O}$  (**4**).** Synthesis of **4** was similar to **3** except using  $\text{MnCl}_2 \cdot 4\text{H}_2\text{O}$  (39.6 mg, 0.20 mmol) instead of  $\text{NiCl}_2 \cdot 6\text{H}_2\text{O}$ . Yellow block-shaped crystals of **4** were isolated manually, washed with distilled water and dried (yield: 38% based on  $\text{H}_5\text{ddba}$ ). Calcd for  $\text{C}_{106}\text{H}_{82}\text{Mn}_4\text{N}_{12}\text{O}_{27}$ : C 51.12, H 1.79, N 4.97%. Found: C 51.27, H 1.80, N 4.95%. IR (KBr,  $\text{cm}^{-1}$ ): 3402 w, 3021 w, 1695 w, 1608 s, 1553 s, 1485 w, 1425 w, 1386 s, 1341 w, 1298 w, 1262 w, 1226 w, 1202 w, 1155 w, 1067 w, 1008 w, 976 w, 908 w, 856 w, 844 w, 804 m, 737 w, 717 w, 669 w, 650 w.

**Synthesis of  $\{[\text{Co}_2(\mu_5\text{-Hddba})(4,4'\text{-bipy})_{1.5}(\text{H}_2\text{O})] \cdot \text{H}_2\text{O}\}_n$  (**5**).** A mixture of  $\text{CoCl}_2 \cdot 6\text{H}_2\text{O}$  (47.4 mg, 0.20 mmol),  $\text{H}_5\text{ddba}$  (45.0 mg, 0.10 mmol), 4,4'-bipy (31.2 mg, 0.20 mmol), NaOH (16.0 mg, 0.40 mmol), and  $\text{H}_2\text{O}$  (10 mL) was stirred at room temperature for 15 min, then sealed in a 25 mL Teflon-lined stainless steel vessel, and heated at 160 °C for 3 days, followed by cooling to room temperature at a rate of 10 °C·h<sup>-1</sup>. Pink block-shaped crystals of **5** were obtained (yield: 45% based on  $\text{H}_5\text{ddba}$ ). Anal. Calcd for  $\text{C}_{38}\text{H}_{26}\text{Co}_2\text{N}_3\text{O}_{12}$ : C, 54.69; H, 3.14; N, 5.04. Found: C, 54.77; H, 3.16; N, 5.06. IR (KBr,  $\text{cm}^{-1}$ ): 3610 w, 3460 w, 3061 w, 1717 w, 1608 s, 1572 m, 1533 m, 1485 w, 1450 w, 1384 s, 1322 w, 1265 w, 1213 m, 1164 w, 1129 w, 1098 w, 1063 w, 1046 w, 901 w, 848 w, 814 m, 795 w, 764 w, 730 w, 681 w, 637 w.

**Synthesis of  $\{[\text{Zn}_2(\mu_5\text{-Hddba})(4,4'\text{-bipy})_{1.5}] \cdot 4,4'\text{-bipy} \cdot 2\text{H}_2\text{O}\}_n$  (**6**).** Synthesis of **6** was similar to **5** except using  $\text{ZnCl}_2$  (27.3 mg, 0.20 mmol) instead of  $\text{CoCl}_2 \cdot 6\text{H}_2\text{O}$ . Colourless block-shaped crystals of **6** were isolated manually, washed with distilled water and dried (yield: 40% based on  $\text{H}_5\text{ddba}$ ). Calcd for  $\text{C}_{48}\text{H}_{34}\text{Zn}_2\text{N}_5\text{O}_{12}$ : C 57.44, H 3.41, N 6.98%. Found: C 57.28, H 3.39, N 7.01%. IR (KBr,  $\text{cm}^{-1}$ ): 3583 w, 3399 w, 3070 w, 1718 w, 1638 s, 1595 s, 1537 m, 1493 w, 1397 s, 1235 w, 1195 w, 1120 w, 1072 w, 1050 w, 993 w, 936 w, 840 w, 809 m, 782 m, 730 w, 695 w, 672 w, 642 w.

**Synthesis of  $[\text{Mn}_2(\mu_6\text{-Hddba})(\text{H}_2\text{biim})(\text{H}_2\text{O})]_n$  (**7**).** A mixture of  $\text{MnCl}_2 \cdot 4\text{H}_2\text{O}$  (39.6 mg, 0.20 mmol),  $\text{H}_5\text{ddba}$  (45.0 mg, 0.10 mmol),  $\text{H}_2\text{biim}$  (26.8 mg, 0.20 mmol), NaOH (16 mg, 0.40 mmol), and

H<sub>2</sub>O (10 mL) was stirred at room temperature for 15 min, then sealed in a 25 mL Teflon-lined stainless steel vessel, and heated at 160 °C for 3 days, followed by cooling to room temperature at a rate of 10 °C·h<sup>-1</sup>. Yellow block-shaped crystals of **7** were isolated manually, washed with distilled water and dried (yield: 53% based on H<sub>5</sub>ddba). Anal. Calcd for C<sub>29</sub>H<sub>18</sub>Mn<sub>2</sub>N<sub>4</sub>O<sub>11</sub>: C, 49.17; H, 2.56; N, 7.91. Found: C, 49.38; H, 2.57; N, 7.87%. IR (KBr, cm<sup>-1</sup>): 3462 w, 3128 w, 1700 m, 1620 s, 1581 s, 1537 s, 1429 m, 1397 s, 1358 s, 1310 m, 1278 w, 1223 m, 1167 w, 1099 w, 996 w, 916 w, 856 w, 804 m, 757 m, 741 w, 686 w, 649 w.

**Synthesis of {[Cd<sub>2</sub>(μ<sub>7</sub>-ddba)(Hbpa)]·5H<sub>2</sub>O}<sub>n</sub> (**8**).** A mixture of CdCl<sub>2</sub>·H<sub>2</sub>O (40.2 mg, 0.20 mmol), H<sub>5</sub>ddba (45.0 mg, 0.10 mmol), bpa (34.2 mg, 0.20 mmol), NaOH (20.0 mg, 0.50 mmol), and H<sub>2</sub>O (10 mL) was stirred at room temperature for 15 min, then sealed in a 25 mL Teflon-lined stainless steel vessel, and heated at 160 °C for 3 days, followed by cooling to room temperature at a rate of 10 °C·h<sup>-1</sup>. Colourless block-shaped crystals of **8** were isolated manually, washed with distilled water and dried (yield: 57% based on H<sub>5</sub>ddba). Anal. Calcd for C<sub>33</sub>H<sub>29</sub>Cd<sub>2</sub>N<sub>3</sub>O<sub>15</sub>: C, 42.51; H, 3.13; N, 4.51. Found: C, 42.43; H, 3.14; N, 4.53%. IR (KBr, cm<sup>-1</sup>): 3431 m, 3251 w, 3064 w, 1643 m, 1604 s, 1576 w, 1520 s, 1433 s, 1397 s, 1362 m, 1313 w, 1218 w, 1198 w, 1131 w, 1099 w, 1059 w, 1016 m, 912 w, 832 w, 780 m, 769 m, 741 w, 697 w, 661 w.

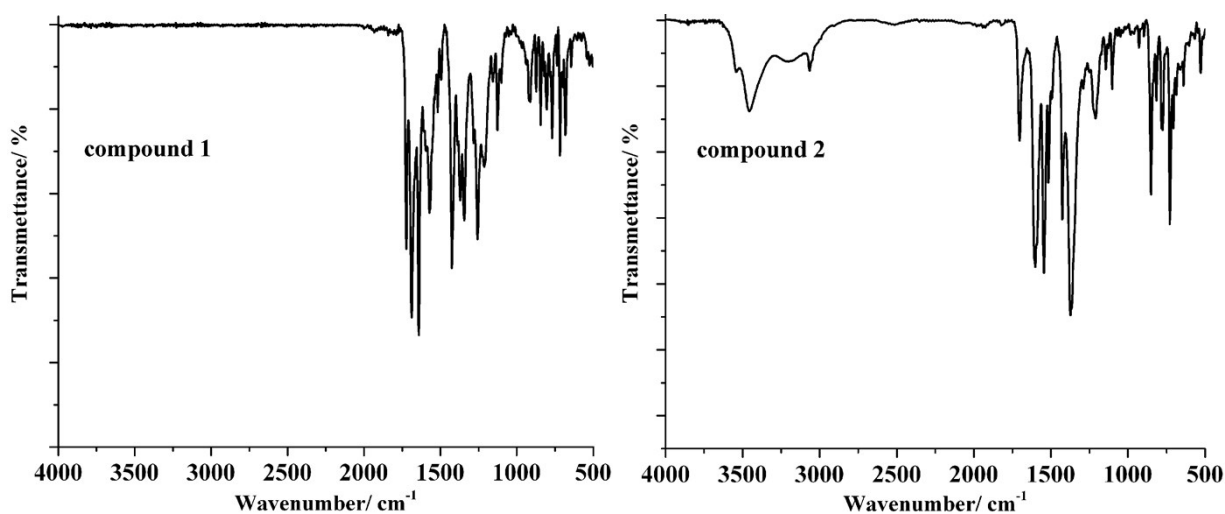

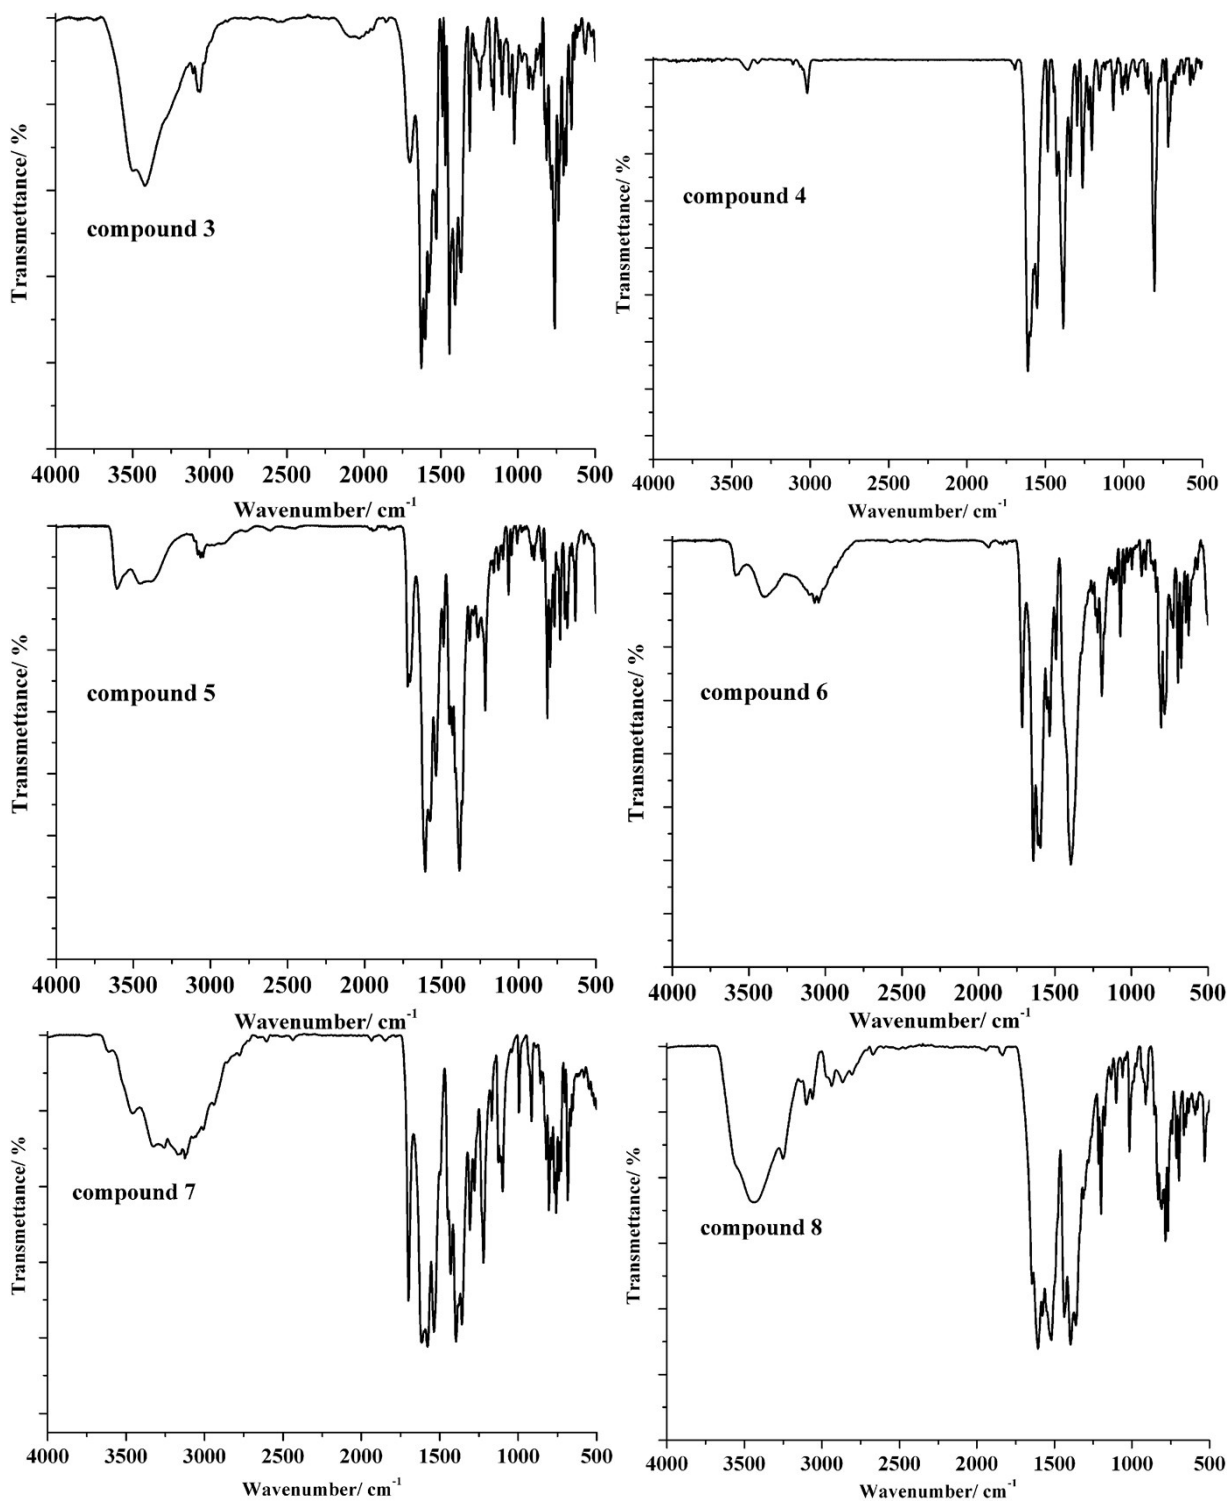

**Fig. S1.** FTIR spectra of compounds 1–8.

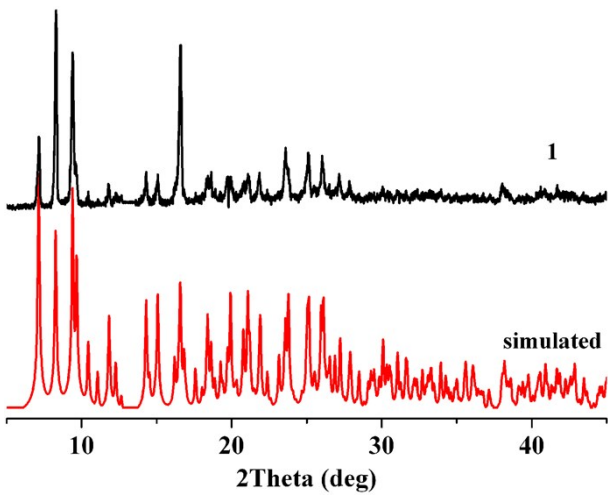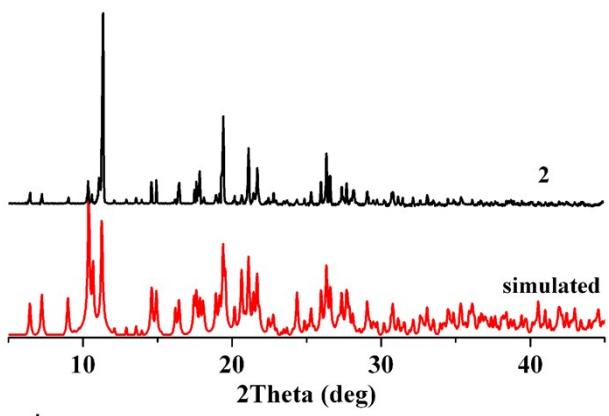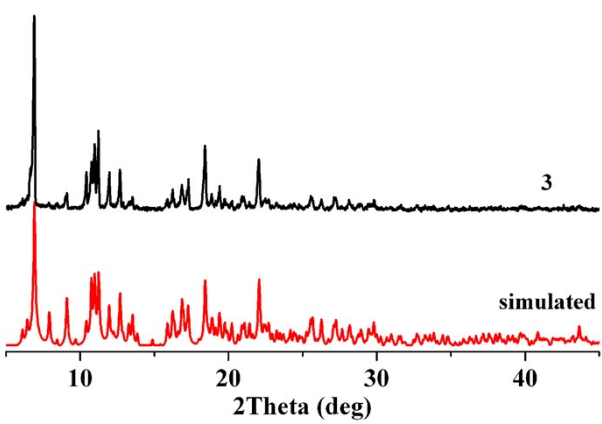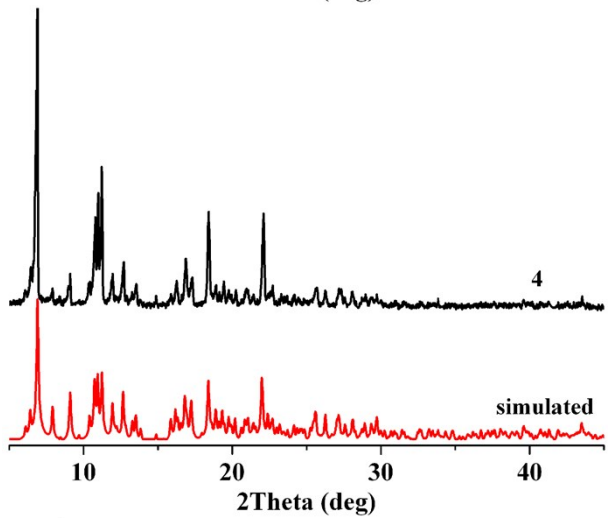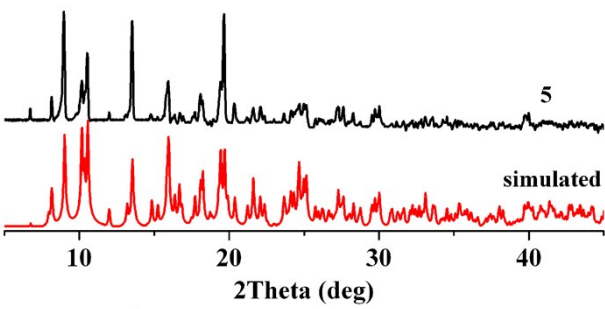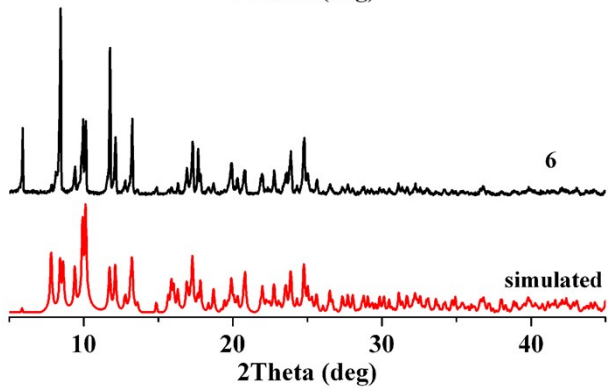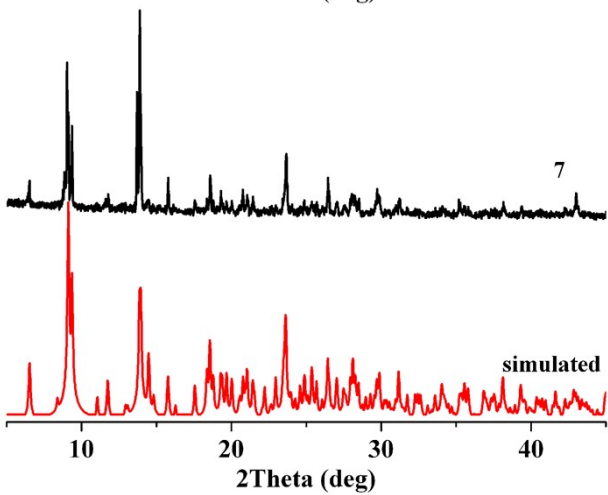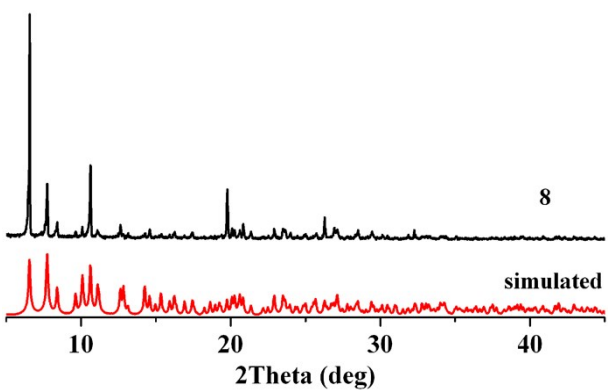

**Fig. S2.** PXRD patterns of compounds **1–8** at room temperature.

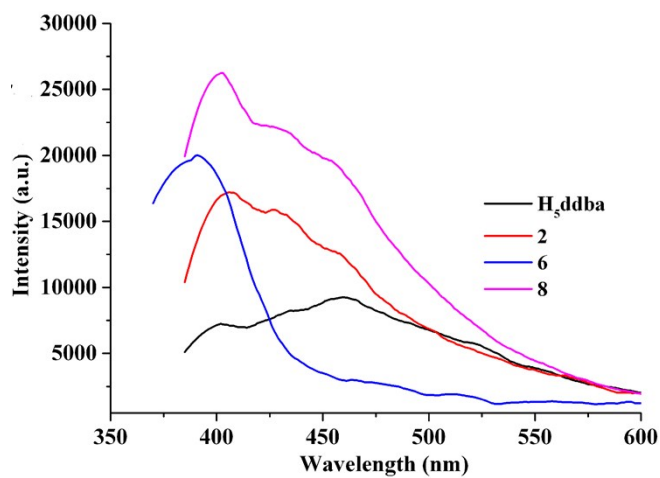

**Fig. S3.** Solid-state emission spectra of H<sub>5</sub>ddbba and compounds **2**, **6**, and **8** at room temperature ( $\lambda_{\text{ex}} = 360$  nm) with emission maxima at 460, 407, 390, and 403 nm, respectively.

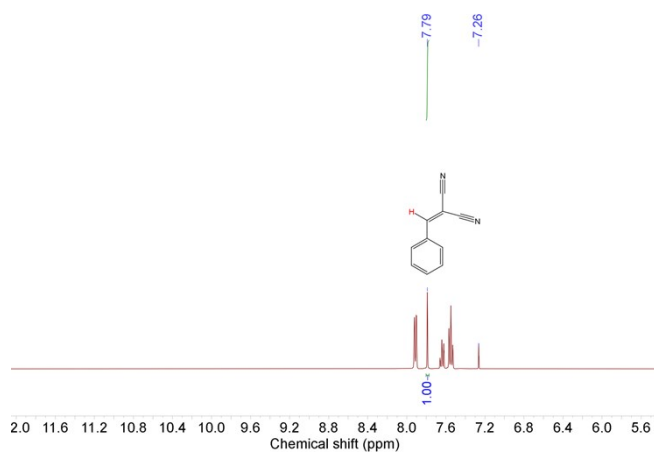

**Fig. S4.** Example of the integration in the <sup>1</sup>H NMR spectrum of the reaction mixture for the determination of the Knoevenagel condensation product (conditions of Table 3, Entry 6).

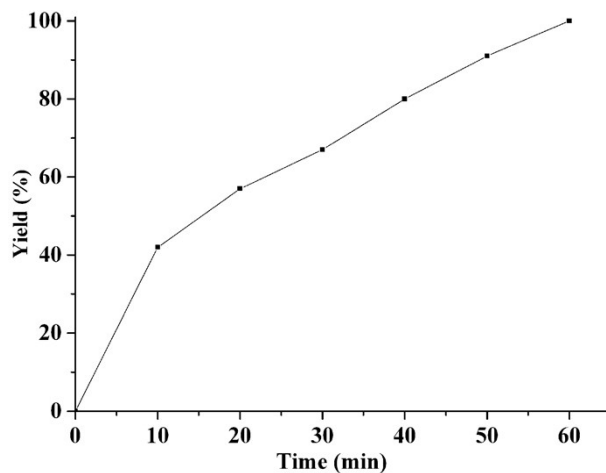

**Fig. S5.** Accumulation of 2-benzylidenemalononitrile vs. time in the Knoevenagel condensation of benzaldehyde with malononitrile catalysed by **1**. Reaction conditions are those of Table 3, entries 1–6.

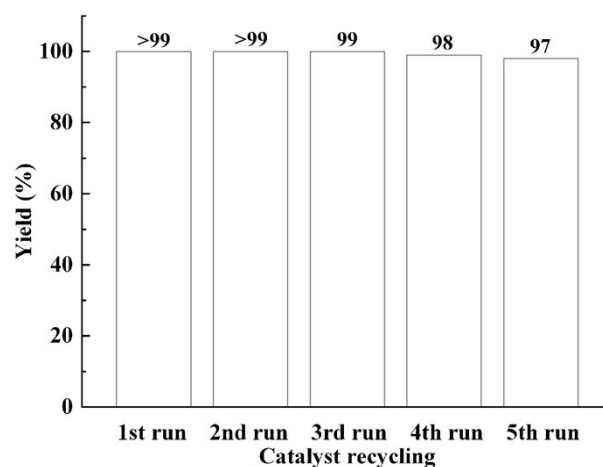

**Fig. S6.** Catalyst recycling experiments in the Knoevenagel condensation of benzaldehyde with malononitrile catalysed by **1**. Reaction conditions are those of Table 3, entry 6.

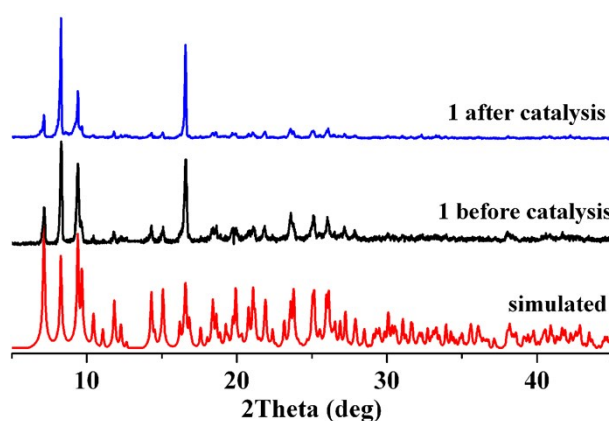

**Fig. S7.** PXRD patterns for **1**: simulated (red), before (black) and after (blue) catalysis.

**Table S1.** Selected bond lengths [ $\text{\AA}$ ] and angles [ $^\circ$ ] for the compounds **1–8<sup>a</sup>**.

|                   |            |                  |           |                  |            |
|-------------------|------------|------------------|-----------|------------------|------------|
| <b>1</b>          |            |                  |           |                  |            |
| Cu(1)-O(1)        | 1.973(3)   | Cu(1)-O(1)i      | 2.497(3)  | Cu(1)-O(7)       | 1.922(3)   |
| Cu(1)-N(1)        | 2.019(4)   | Cu(1)-N(2)       | 2.024(3)  |                  |            |
| O(7)-Cu(1)-O(1)   | 91.08(12)  | O(7)-Cu(1)-N(1)  | 94.27(14) | O(1)-Cu(1)-N(1)  | 174.27(13) |
| O(7)-Cu(1)-N(2)   | 172.05(13) | O(1)-Cu(1)-N(2)  | 93.29(13) | N(1)-Cu(1)-N(2)  | 81.63(14)  |
| O(1)-Cu(1)-O(1)i  | 74.63(10)  | O(7)-Cu(1)-O(1)i | 86.95(14) | N(1)-Cu(1)-O(1)i | 107.66(15) |
| N(2)-Cu(1)-O(1)i  | 87.79(11)  |                  |           |                  |            |
| <b>2</b>          |            |                  |           |                  |            |
| Cd(1)-O(1)        | 2.317(6)   | Cd(1)-O(2)       | 2.553(7)  | Cd(1)-O(4)i      | 2.258(6)   |
| Cd(1)-O(11)       | 2.300(7)   | Cd(1)-N(1)       | 2.340(9)  | Cd(1)-N(2)       | 2.336(8)   |
| Cd(2)-O(7)        | 2.469(6)   | Cd(2)-O(8)       | 2.332(6)  | Cd(2)-O(10)ii    | 2.258(7)   |
| Cd(2)-O(12)       | 2.323(6)   | Cd(2)-N(3)       | 2.291(9)  | Cd(2)-N(4)       | 2.351(9)   |
| O(4)i-Cd(1)-O(11) | 97.3(2)    | O(4)i-Cd(1)-O(1) | 85.6(2)   | O(1)-Cd(1)-O(11) | 93.2(3)    |
| O(4)i-Cd(1)-N(2)  | 132.9(2)   | O(11)-Cd(1)-N(2) | 93.2(3)   | O(1)-Cd(1)-N(2)  | 139.5(2)   |
| O(4)I-Cd(1)-N(1)  | 89.8(3)    | O(11)-Cd(1)-N(1) | 164.0(3)  | O(1)-Cd(1)-N(1)  | 101.7(3)   |
| N(1)-Cd(1)-N(2)   | 71.6(3)    | O(2)-Cd(1)-O(4)i | 134.6(2)  | O(11)-Cd(1)-O(2) | 101.7(3)   |
| O(1)-Cd(1)-O(2)   | 52.8(2)    | O(2)-Cd(1)-N(2)  | 86.8(2)   | N(1)-Cd(1)-O(2)  | 83.1(3)    |



|                    |          |                     |          |                  |          |
|--------------------|----------|---------------------|----------|------------------|----------|
| N(3)-Cd(2)-O(10)ii | 128.6(3) | O(10)ii-Cd(2)-O(12) | 96.6(3)  | O(12)-Cd(2)-N(3) | 94.3(3)  |
| O(10)ii-Cd(2)-O(8) | 83.8(2)  | O(8)-Cd(2)-N(3)     | 143.9(3) | O(12)-Cd(2)-O(8) | 97.4(2)  |
| O(10)ii-Cd(2)-N(4) | 92.5(3)  | N(3)-Cd(2)-N(4)     | 71.4(4)  | O(12)-Cd(2)-N(4) | 165.7(3) |
| O(8)-Cd(2)-N(4)    | 94.6(3)  | O(10)ii-Cd(2)-O(7)  | 136.7(2) | O(7)-Cd(2)-N(3)  | 91.7(3)  |
| O(12)-Cd(2)-O(7)   | 95.1(3)  | O(7)-Cd(2)-O(8)     | 53.4(2)  | O(7)-Cd(2)-N(4)  | 85.6(3)  |

### 3

|                   |            |                  |            |                  |            |
|-------------------|------------|------------------|------------|------------------|------------|
| Ni(1)-O(1)i       | 2.0142(17) | Ni(1)-O(2)       | 2.0449(17) | Ni(1)-O(7)       | 2.0370(17) |
| Ni(1)-O(11)       | 2.0897(13) | Ni(1)-N(1)       | 2.081(2)   | Ni(1)-N(2)       | 2.113(2)   |
| Ni(2)-O(9)        | 2.0829(17) | Ni(2)-O(10)      | 2.1716(19) | Ni(2)-N(3)       | 2.059(2)   |
| Ni(2)-N(4)        | 2.044(2)   | Ni(2)-N(5)       | 2.047(3)   | Ni(2)-N(6)       | 2.069(2)   |
| O(1)i-Ni(1)-O(7)  | 179.54(8)  | O(1)i-Ni(1)-O(2) | 90.75(7)   | O(7)-Ni(1)-O(2)  | 88.93(7)   |
| O(1)i-Ni(1)-N(1)  | 94.39(8)   | O(7)-Ni(1)-N(1)  | 85.27(8)   | O(2)-Ni(1)-N(1)  | 89.39(9)   |
| O(1)i-Ni(1)-O(11) | 89.41(6)   | O(11)-Ni(1)-O(7) | 90.94(6)   | O(11)-Ni(1)-O(2) | 93.77(7)   |
| O(11)-Ni(1)-N(1)  | 175.02(8)  | O(1)i-Ni(1)-N(2) | 92.00(8)   | O(7)-Ni(1)-N(2)  | 88.24(9)   |
| O(2)-Ni(1)-N(2)   | 167.58(9)  | N(2)-Ni(1)-N(1)  | 78.32(10)  | O(11)-Ni(1)-N(2) | 98.36(9)   |
| N(4)-Ni(2)-N(5)   | 96.18(11)  | N(4)-Ni(2)-N(3)  | 79.51(10)  | N(3)-Ni(2)-N(5)  | 101.86(10) |
| N(4)-Ni(2)-N(6)   | 100.23(10) | N(6)-Ni(2)-N(5)  | 79.42(10)  | N(3)-Ni(2)-N(6)  | 178.71(10) |
| N(4)-Ni(2)-O(9)   | 166.42(10) | N(5)-Ni(2)-O(9)  | 96.76(9)   | N(3)-Ni(2)-O(9)  | 93.80(8)   |
| N(6)-Ni(2)-O(9)   | 86.19(8)   | N(4)-Ni(2)-O(10) | 105.35(9)  | N(5)-Ni(2)-O(10) | 157.81(8)  |
| N(3)-Ni(2)-O(10)  | 87.49(9)   | N(6)-Ni(2)-O(10) | 91.37(8)   | O(9)-Ni(2)-O(10) | 62.25(7)   |

### 4

|                   |            |                  |            |                   |            |
|-------------------|------------|------------------|------------|-------------------|------------|
| Mn(1)-O(1)i       | 2.034(3)   | Mn(1)-O(2)       | 2.016(3)   | Mn(1)-O(7)i       | 2.039(3)   |
| Mn(1)-O(11)       | 2.098(3)   | Mn(1)-N(1)       | 2.095(5)   | Mn(1)-N(2)        | 2.072(5)   |
| Mn(2)-O(9)        | 2.176(4)   | Mn(2)-O(10)      | 2.097(4)   | Mn(2)-N(3)        | 2.052(4)   |
| Mn(2)-N(4)        | 2.062(4)   | Mn(2)-N(5)       | 2.042(5)   | Mn(2)-N(6)        | 2.058(4)   |
| O(2)-Mn(1)-O(1)i  | 90.89(14)  | O(7)-Mn(1)-O(2)  | 179.68(14) | O(1)i-Mn(1)-O(7)i | 88.94(14)  |
| O(2)-Mn(1)-N(2)   | 94.17(16)  | N(2)-Mn(1)-O(1)i | 89.34(17)  | N(2)-Mn(1)-O(7)i  | 86.10(16)  |
| O(2)-Mn(1)-N(1)   | 92.09(17)  | O(1)i-Mn(1)-N(1) | 166.96(19) | O(7)i-Mn(1)-N(1)  | 88.12(17)  |
| N(2)-Mn(1)-N(1)   | 77.8(2)    | O(2)-Mn(1)-O(11) | 89.43(12)  | O(1)i-Mn(1)-O(11) | 93.85(13)  |
| O(7)i-Mn(1)-O(11) | 90.31(12)  | O(11)-Mn(1)-N(2) | 175.16(17) | O(11)-Mn(1)-N(1)  | 98.87(18)  |
| N(5)-Mn(2)-N(3)   | 101.17(19) | N(5)-Mn(2)-N(6)  | 79.8(2)    | N(3)-Mn(2)-N(6)   | 178.9(2)   |
| N(5)-Mn(2)-N(4)   | 96.0(2)    | N(3)-Mn(2)-N(4)  | 79.36(19)  | N(6)-Mn(2)-N(4)   | 100.09(19) |
| O(10)-Mn(2)-N(5)  | 96.59(17)  | O(10)-Mn(2)-N(3) | 94.09(17)  | O(10)-Mn(2)-N(6)  | 86.27(16)  |
| O(10)-Mn(2)-N(4)  | 166.69(19) | O(9)-Mn(2)-N(5)  | 158.08(17) | O(9)-Mn(2)-N(3)   | 87.41(16)  |
| O(9)-Mn(2)-N(6)   | 91.87(17)  | N(4)-Mn(2)-O(9)  | 105.40(17) | O(10)-Mn(2)-O(9)  | 62.43(13)  |

### 5

|                    |           |                      |            |                     |           |
|--------------------|-----------|----------------------|------------|---------------------|-----------|
| Co(1)-O(1)         | 2.079(4)  | Co(1)-O(5)i          | 2.097(4)   | Co(1)-O(6)ii        | 2.083(5)  |
| Co(1)-O(11)        | 2.203(6)  | Co(1)-N(2)           | 2.157(6)   | Co(1)-N(3)iii       | 2.158(5)  |
| Co(2)-O(3)         | 2.131(5)  | Co(2)-O(4)iv         | 2.034(6)   | Co(2)-O(7)          | 2.007(5)  |
| Co(2)-O(8)iv       | 2.034(5)  | Co(2)-N(1)           | 2.035(6)   |                     |           |
| O(1)-Co(1)-O(6)ii  | 92.30(19) | O(1)-Co(1)-O(5)i     | 166.83(19) | O(6)ii-Co(1)-O(5)i  | 98.09(19) |
| O(1)-Co(1)-N(2)    | 87.5(2)   | O(6)ii-Co(1)-N(2)    | 86.6(2)    | O(5)i-Co(1)-N(2)    | 85.10(19) |
| O(1)-Co(1)-N(3)iii | 94.68(19) | O(6)ii-Co(1)-N(3)iii | 91.7(2)    | O(5)i-Co(1)-N(3)iii | 93.09(19) |
| N(2)-Co(1)-N(3)iii | 177.3(2)  | O(1)-Co(1)-O(11)     | 87.5(2)    | O(11)-Co(1)-O(6)ii  | 179.7(2)  |
| O(11)-Co(1)-O(5)i  | 82.2(2)   | O(11)-Co(1)-N(2)     | 93.6(2)    | O(11)-Co(1)-N(3)iii | 88.1(2)   |
| O(7)-Co(2)-N(1)    | 95.5(2)   | O(7)-Co(2)-O(8)iv    | 165.57(19) | O(8)iv-Co(2)-N(1)   | 96.7(2)   |
| O(7)-Co(2)-O(4)iv  | 96.2(2)   | N(1)-Co(2)-O(4)iv    | 101.1(2)   | O(4)iv-Co(2)-O(8)iv | 88.9(2)   |
| O(7)-Co(2)-O(3)    | 87.2(2)   | N(1)-Co(2)-O(3)      | 93.3(2)    | O(3)-Co(2)-O(8)iv   | 84.5(2)   |
| O(3)-Co(2)-O(4)iv  | 164.8(2)  |                      |            |                     |           |

### 6

|                    |            |                     |            |                       |            |
|--------------------|------------|---------------------|------------|-----------------------|------------|
| Zn(1)-O(1)         | 1.967(3)   | Zn(1)-O(2)ii        | 1.964(3)   | Zn(1)-O(9)i           | 2.080(4)   |
| Zn(1)-O(10)i       | 2.269(4)   | Zn(1)-N(1)          | 2.062(4)   | Zn(2)-O(3)            | 2.025(3)   |
| Zn(2)-O(4)iii      | 2.036(3)   | Zn(2)-O(7)          | 2.079(3)   | Zn(2)-O(8)iii         | 2.023(3)   |
| Zn(2)-N(2)         | 2.041(3)   |                     |            |                       |            |
| O(1)-Zn(1)-O(2)ii  | 116.87(14) | O(1)-Zn(1)-N(1)     | 99.73(13)  | N(1)-Zn(1)-O(2)ii     | 95.56(14)  |
| O(1)-Zn(1)-O(9)i   | 106.07(15) | O(9)i-Zn(1)-O(2)ii  | 98.26(14)  | N(1)-Zn(1)-O(9)i      | 140.93(16) |
| O(1)-Zn(1)-O(10)i  | 96.05(14)  | O(2)ii-Zn(1)-O(10)i | 145.10(14) | N(1)-Zn(1)-O(10)i     | 89.56(15)  |
| O(9)i-Zn(1)-O(10)i | 59.31(13)  | O(3)-Zn(2)-O(8)iii  | 90.01(15)  | O(4)iii-Zn(2)-O(8)iii | 89.19(15)  |
| O(3)-Zn(2)-O(4)iii | 157.84(13) | N(2)-Zn(2)-O(8)iii  | 108.72(15) | N(2)-Zn(2)-O(3)       | 99.31(15)  |
| N(2)-Zn(2)-O(4)iii | 101.91(15) | O(7)-Zn(2)-O(8)iii  | 157.58(13) | O(7)-Zn(2)-O(3)       | 86.15(14)  |
| O(7)-Zn(2)-O(4)iii | 86.19(14)  | O(7)-Zn(2)-N(2)     | 93.70(14)  |                       |            |

## 7

|                     |            |                      |            |                      |            |
|---------------------|------------|----------------------|------------|----------------------|------------|
| Mn(1)-O(1)          | 2.109(3)   | Mn(1)-O(4)i          | 2.163(3)   | Mn(1)-O(5)ii         | 2.405(3)   |
| Mn(1)-O(8)i         | 2.135(2)   | Mn(1)-N(1)           | 2.223(3)   | Mn(1)-N(4)           | 2.261(3)   |
| Mn(2)-O(2)iii       | 2.121(2)   | Mn(2)-O(3)iv         | 2.276(3)   | Mn(2)-O(4)iv         | 2.449(3)   |
| Mn(2)-O(5)          | 2.101(2)   | Mn(2)-O(7)iv         | 2.201(2)   | Mn(2)-O(11)          | 2.127(3)   |
| O(1)-Mn(1)-O(8)i    | 85.81(10)  | O(1)-Mn(1)-O(4)i     | 91.24(11)  | O(4)i-Mn(1)-O(8)i    | 93.51(11)  |
| O(1)-Mn(1)-N(1)     | 104.37(11) | O(8)i-Mn(1)-N(1)     | 157.88(12) | O(4)i-Mn(1)-N(1)     | 105.65(12) |
| O(1)-Mn(1)-N(1)     | 100.09(12) | O(8)i-Mn(1)-N(4)     | 83.70(12)  | O(4)i-Mn(1)-N(4)     | 168.07(12) |
| N(1)-Mn(1)-N(4)     | 75.28(13)  | O(5)ii-Mn(1)-O(1)    | 166.03(10) | O(8)i-Mn(1)-O(5)ii   | 88.21(9)   |
| O(4)i-Mn(1)-O(5)ii  | 76.52(9)   | N(1)-Mn(1)-O(5)ii    | 85.68(10)  | N(4)-Mn(1)-O(5)ii    | 91.77(11)  |
| O(2)iii-Mn(2)-O(5)  | 101.40(10) | O(5)-Mn(2)-O(11)     | 118.16(13) | O(2)iii-Mn(2)-O(11)  | 90.07(10)  |
| O(7)iv-Mn(2)-O(5)   | 101.62(10) | O(2)iii-Mn(2)-O(7)iv | 156.93(10) | O(11)-Mn(2)-O(7)iv   | 80.35(11)  |
| O(5)-Mn(2)-O(3)iv   | 131.53(10) | O(2)iii-Mn(2)-O(3)iv | 83.77(10)  | O(11)-Mn(2)-O(3)iv   | 109.92(13) |
| O(7)iv-Mn(2)-O(3)iv | 79.94(10)  | O(5)-Mn(2)-O(4)iv    | 76.67(9)   | O(2)iii-Mn(2)-O(4)iv | 88.71(9)   |
| O(11)-Mn(2)-O(4)iv  | 165.04(13) | O(7)iv-Mn(2)-O(4)iv  | 95.18(9)   | O(3)iv-Mn(2)-O(4)iv  | 55.13(9)   |

## 8

|                      |            |                       |            |                    |            |
|----------------------|------------|-----------------------|------------|--------------------|------------|
| Cd(1)-O(1)           | 2.3124(17) | Cd(1)-O(2)i           | 2.3153(16) | Cd(1)-O(5)ii       | 2.3996(17) |
| Cd(1)-O(6)ii         | 2.3012(18) | Cd(1)-O(7)            | 2.2097(17) | Cd(1)-O(8)i        | 2.2082(18) |
| Cd(2)-O(2)iii        | 2.3329(17) | Cd(2)-O(3)            | 2.299(2)   | Cd(2)-O(4)         | 2.3962(19) |
| Cd(2)-O(9)iv         | 2.490(2)   | Cd(2)-O(10)iv         | 2.2816(19) | Cd(2)-N(1)         | 2.336(2)   |
| O(7)-Cd(1)-O(8)i     | 151.11(7)  | O(8)i-Cd(1)-O(6)ii    | 90.61(7)   | O(7)-Cd(1)-O(6)ii  | 116.57(7)  |
| O(1)-Cd(1)-O(8)i     | 89.58(7)   | O(7)-Cd(1)-O(1)       | 83.49(7)   | O(6)ii-Cd(1)-O(1)  | 85.32(7)   |
| O(8)i-Cd(1)-O(2)i    | 83.64(7)   | O(7)-Cd(1)-O(2)i      | 89.42(7)   | O(6)ii-Cd(1)-O(2)i | 121.80(6)  |
| O(2)i-Cd(1)-O(1)     | 151.96(6)  | O(8)i-Cd(1)-O(5)ii    | 117.68(7)  | O(7)-Cd(1)-O(5)ii  | 87.55(7)   |
| O(6)ii-Cd(1)-O(5)ii  | 55.58(6)   | O(5)ii-Cd(1)-O(1)     | 129.88(6)  | O(5)ii-Cd(1)-O(2)i | 76.56(6)   |
| O(3)-Cd(2)-O(10)iv   | 132.02(8)  | O(2)iii-Cd(2)-O(10)iv | 100.55(7)  | O(3)-Cd(2)-O(2)iii | 98.85(7)   |
| N(1)-Cd(2)-O(10)iv   | 85.78(8)   | O(3)-Cd(2)-N(1)       | 137.72(7)  | N(1)-Cd(2)-O(2)iii | 89.76(7)   |
| O(4)-Cd(2)-O(10)iv   | 140.46(8)  | O(3)-Cd(2)-O(4)       | 55.18(7)   | O(4)-Cd(2)-O(2)iii | 117.49(7)  |
| O(2)iii-Cd(2)-O(9)iv | 84.10(7)   | O(9)iv-Cd(2)-O(10)iv  | 54.26(7)   | O(3)-Cd(2)-O(9)iv  | 89.08(8)   |
| N(1)-Cd(2)-O(10)     | 148.83(7)  | N(1)-Cd(2)-O(9)iv     | 104.51(8)  | O(9)iv-Cd(2)-O(4)  | 91.80(8)   |

<sup>a</sup>Symmetry transformations used to generate equivalent atoms: i  $-x+2, -y+1, -z+1$  for **1**; i  $x-1, y, z$ ; ii  $x+1, y, z$  for **2**; i  $-x+1, y, -z+3/2$  for **3**; #1  $-x+2, y, -z+1/2$  for **4**; i  $x, y-1, z+1$ ; ii  $-x+1, -y, -z$ ; iii  $x-1, y, z$ ; iv  $-x+2, -y, -z$  for **5**; i  $-x+1, -y+1, -z+2$ ; ii  $-x+1, -y+1, -z+3$ ; iii  $-x+1, -y+2, -z+2$  for **6**; i  $-x+1, -y+1, -z+1$ ; ii  $x-1/2, -y+1/2, z-1/2$ ; iii  $x+1/2, y-1/2, z$ ; iv  $-x+3/2, y-1/2, -z+3/2$  for **7**; i  $-x, -y, -z+1$ ; ii  $-x+1, -y+1, -z+1$ ; iii  $-x, -y, -z$ ; iv  $x, y+1, z-1$  for **8**.

**Table S2.** Hydrogen Bonds in Crystal Packing [ $\text{\AA}$ ,  $^\circ$ ] of **1**, **2**, **4–6**, and **8**.

| Complexes          | D-H...A             | $d(\text{D-H})$ | $d(\text{H...A})$ | $d(\text{D...A})$ | $\angle\text{DHA}$      | Symmetry code           |
|--------------------|---------------------|-----------------|-------------------|-------------------|-------------------------|-------------------------|
| <b>1</b>           | O(4)-H(4)···O(5)    | 0.822           | 2.298             | 2.978             | 140.45                  | $x+1/2, -y+3/2, z-1/2$  |
|                    | O(6)-H(1)···O(2)    | 0.820           | 1.811             | 2.630             | 176.18                  | $-x+1, -y+1, -z+1$      |
|                    | O(9)-H(9)···O(10)   | 0.823           | 1.850             | 2.660             | 167.86                  | $-x+2, -y+1, -z+2$      |
| <b>2</b>           | O(5)-H(5)···O(14)   | 0.820           | 1.648             | 2.465             | 173.59                  |                         |
|                    | O(11)-H(1W)···O(8)  | 0.850           | 2.039             | 2.889             | 179.06                  | $x-1/2, -y+1/2, z-1/2$  |
|                    | O(11)-H(2W)···O(10) | 0.850           | 1.906             | 2.756             | 179.64                  | $x+1/2, -y+1/2, z-1/2$  |
|                    | O(12)-H(3W)···O(1)  | 0.850           | 2.026             | 2.877             | 179.56                  | $x+1/2, -y+1/2, z+1/2$  |
|                    | O(12)-H(4W)···O(4)  | 0.850           | 1.878             | 2.729             | 179.68                  | $x-1/2, -y+1/2, z+1/2$  |
|                    | O(13)-H(5W)···O(6)  | 0.850           | 2.103             | 2.953             | 179.35                  | $x-1/2, -y+1/2, z+1/2$  |
|                    | O(13)-H(6W)···O(9)  | 0.850           | 1.818             | 2.668             | 179.04                  |                         |
|                    | O(14)-H(7W)···O(13) | 0.847           | 1.767             | 2.559             | 154.79                  | $-x+3/2, y+1/2, -z+1/2$ |
| O(14)-H(8W)···O(7) | 0.850               | 1.861           | 2.710             | 177.89            | $-x+3/2, y+1/2, -z+1/2$ |                         |
| <b>3</b>           | O(4)-H(4)···O(5)    | 0.841           | 1.628             | 2.463             | 170.96                  | $x, -y, z-1/2$          |
|                    | O(11)-H(1W)···O(8)  | 0.853           | 1.716             | 2.546             | 163.55                  |                         |
|                    | O(12)-H(3W)···O(6)  | 0.850           | 2.097             | 2.947             | 179.34                  | $-x+1/2, -y+1/2, -z+1$  |
|                    | O(12)-H(4W)···O(6)  | 0.850           | 1.988             | 2.838             | 179.09                  | $x, y, z-1$             |
| <b>4</b>           | O(3)-H(3)···O(6)    | 0.820           | 1.654             | 2.453             | 164.37                  | $x, -y+2, z-1/2$        |
|                    | O(11)-H(1W)···O(8)  | 0.850           | 1.699             | 2.549             | 179.35                  | $-x+2, y, -z+1/2$       |
|                    | O(11)-H(2W)···O(8)  | 0.850           | 1.699             | 2.549             | 179.35                  |                         |
|                    | O(12)-H(3W)···O(5)  | 0.850           | 2.018             | 2.868             | 179.21                  |                         |
|                    | O(12)-H(4W)···O(8)  | 0.850           | 2.125             | 2.975             | 178.60                  | $-x+3/2, -y+3/2, -z+1$  |
| <b>5</b>           | O(10)-H(10)···O(12) | 0.820           | 1.884             | 2.659             | 157.14                  | $-x+2, -y+1, -z$        |
|                    | O(11)-H(2W)···O(2)  | 0.850           | 1.799             | 2.648             | 178.64                  |                         |
|                    | O(12)-H(3W)···O(5)  | 0.850           | 2.121             | 2.971             | 179.60                  | $-x+1, -y+1, -z$        |
|                    | O(12)-H(4W)···O(11) | 0.732           | 2.261             | 2.990             | 173.26                  | $-x+1, -y, -z+1$        |
| <b>6</b>           | O(6)-H(6)···O(10)   | 0.820           | 1.850             | 2.613             | 154.39                  | $x+1, y, z$             |
|                    | O(11)-H(1W)···O(12) | 0.850           | 1.898             | 2.725             | 164.02                  | $x+1, y, z$             |
|                    | O(11)-H(2W)···O(12) | 0.850           | 2.221             | 2.820             | 127.46                  | $-x+1, -y+1, -z+1$      |
|                    | O(12)-H(3W)···O(1)  | 0.850           | 2.194             | 3.044             | 179.42                  | $-x+1, -y+1, -z+2$      |
|                    | O(12)-H(4W)···O(9)  | 0.850           | 2.464             | 3.314             | 179.8                   | $-x+1, -y+1, -z+1$      |
| <b>7</b>           | N(2)-H(1)···O(7)    | 0.868           | 2.030             | 2.846             | 157.93                  | $x-1/2, -y+1/2, z-1/2$  |
|                    | N(3)-H(2)···O(3)    | 0.860           | 2.076             | 2.850             | 149.36                  | $x-1/2, -y+1/2, z-1/2$  |
|                    | O(10)-H(45)···O(6)  | 0.820           | 1.894             | 2.683             | 161.22                  | $x+1/2, y+1/2, z$       |
|                    | O(11)-H(1W)···O(1)  | 0.837           | 2.195             | 2.808             | 130.11                  | $x+1/2, y-1/2, z$       |
|                    | O(11)-H(2W)···O(9)  | 0.836           | 1.971             | 2.726             | 149.92                  | $x-1/2, y-1/2, z$       |
| <b>8</b>           | N(3)-H(2)···O(5)    | 0.893           | 1.938             | 2.799             | 161.30                  | $-x, -y+1, -z$          |

**Table S3.** Knoevenagel condensation of Aliphatic Aldehydes with Malononitrile.<sup>a</sup>

| Entry | Aldehyde substrate       | Product yield, % <sup>b</sup> |
|-------|--------------------------|-------------------------------|
|       |                          |                               |
| 1     | Cyclopropyl formaldehyde | >99                           |
| 2     | Acetaldehyde             | >99                           |
| 3     | Propanal                 | >99                           |
| 4     | N-butyl aldehyde         | >99                           |
| 5     | Amyl aldehyde            | >99                           |

<sup>a</sup>Conditions: fatty aldehyde substrate (0.5 mmol), malononitrile (1.0 mmol), catalyst **1** (2.0 mol.%), H<sub>2</sub>O solvent (1.0 mL), temperature (25 °C). <sup>b</sup>Yield based on <sup>1</sup>H NMR analysis: [moles of product per mol of aldehyde substrate]×100%.

**Table S4.** Comparison among various catalysts for the Knoevenagel condensation reaction between malononitrile and benzaldehyde.

| Entry | Catalyst                                                                                                                                                                             | Catalyst (mol%) | Solvent            | Time (h) | Temp. (°C)      | Product yield (%) | Ref.      |
|-------|--------------------------------------------------------------------------------------------------------------------------------------------------------------------------------------|-----------------|--------------------|----------|-----------------|-------------------|-----------|
| 1     | [Cu <sub>2</sub> (μ-H <sub>3</sub> ddbba) <sub>2</sub> (phen) <sub>2</sub> ]                                                                                                         | 2               | H <sub>2</sub> O   | 1        | RT <sup>a</sup> | >99               | This work |
| 2     | Zn <sub>3</sub> (OH)(ATTCA) <sub>2</sub> (H <sub>2</sub> O)]·C <sub>2</sub> H <sub>6</sub> NH <sub>2</sub> ·4DMF·H <sub>2</sub> O                                                    | 10              | DCM                | 5        | RT              | 94                | 72        |
| 3     | [Zn <sub>3</sub> (L) <sub>2</sub> (μ <sub>2</sub> -OH) <sub>2</sub> ] <sub>n</sub>                                                                                                   | 4               | H <sub>2</sub> O   | 8        | 90              | 78                | 73        |
| 4     | [Zn <sub>2</sub> (TCA)(BIB) <sub>2.5</sub> ](NO <sub>3</sub> )                                                                                                                       | 0.3             | –                  | 1        | 60              | 99                | 74        |
| 5     | {[Zr <sub>6</sub> (μ <sub>3</sub> -O) <sub>4</sub> (μ <sub>3</sub> -OH) <sub>4</sub> (OH) <sub>4</sub> (H <sub>2</sub> O) <sub>4</sub> (DCBA) <sub>2</sub> ]·5DMF·3H <sub>2</sub> O} | 10              | DCM                | 5        | RT              | 89                | 5         |
| 6     | {[Ba <sub>3</sub> Zn <sub>4</sub> (TDP) <sub>2</sub> (HCO <sub>2</sub> ) <sub>2</sub> (OH <sub>2</sub> ) <sub>2</sub> ]·7DMF·4H <sub>2</sub> O} <sub>n</sub>                         | 3               | Ethanol            | 1        | 60              | 99                | 75        |
| 7     | {[Zn(L)(bpfp)](H <sub>2</sub> O) <sub>3</sub> ] <sub>n</sub>                                                                                                                         | 5               | DMF                | 3        | 35              | 98                | 57        |
| 8     | [[Zn(L)(H <sub>2</sub> O) <sub>2</sub> ] <sub>n</sub> ·n(N-methylformamide)                                                                                                          | 3               | MeOH               | 1.5      | 40              | 75                | 76        |
| 9     | [PbL <sub>2</sub> ]·2DMF·6H <sub>2</sub> O                                                                                                                                           | 3               | CH <sub>3</sub> CN | 24       | RT              | >99               | 77        |

<sup>a</sup>RT, room temperature.

**Table S5.** Knoevenagel condensation of substituted benzaldehydes with malononitrile catalyzed by **3** and **4**.<sup>a</sup>

| Entry | Aldehyde substrate            | Product yield, % <sup>b</sup> |          |
|-------|-------------------------------|-------------------------------|----------|
|       |                               | <b>3</b>                      | <b>4</b> |
| 1     | <i>p</i> -Nitrobenzaldehyde   | >99                           | >99      |
| 2     | <i>o</i> -Nitrobenzaldehyde   | >99                           | >99      |
| 3     | <i>m</i> -Nitrobenzaldehyde   | >99                           | >99      |
| 4     | Benzaldehyde                  | 99                            | 99       |
| 5     | <i>p</i> -Chlorobenzaldehyde  | >99                           | >99      |
| 6     | <i>p</i> -Methylbenzaldehyde  | 99                            | 97       |
| 7     | <i>p</i> -Methoxybenzaldehyde | 80                            | 79       |
| 8     | <i>p</i> -Hydroxybenzaldehyde | 56                            | 58       |
| 9     | Cinnamaldehyde                | 98                            | 94       |
| 10    | Cyclopropyl formaldehyde      | >99                           | 99       |
| 11    | Acetaldehyde                  | >99                           | >99      |
| 12    | Propanal                      | >99                           | >99      |
| 13    | N-butyl aldehyde              | >99                           | 99       |
| 14    | Amyl aldehyde                 | >99                           | 99       |

<sup>a</sup>Conditions: aldehyde (0.5 mmol), malononitrile (1.0 mmol), catalyst **3** or **4** (2.0 mol.%), H<sub>2</sub>O (1.0 mL), 25 °C. <sup>b</sup>Yield on the basis of <sup>1</sup>H NMR analysis: [moles of product per mol of aldehyde substrate]×100%.
